# Supplementary material
Source: publisher site journal article supplement (https://www.dovepress.com/get_supplementary_file.php?f=461141.docx)
Supplement: Supplementary file 1 [file get_supplementary_file.php]

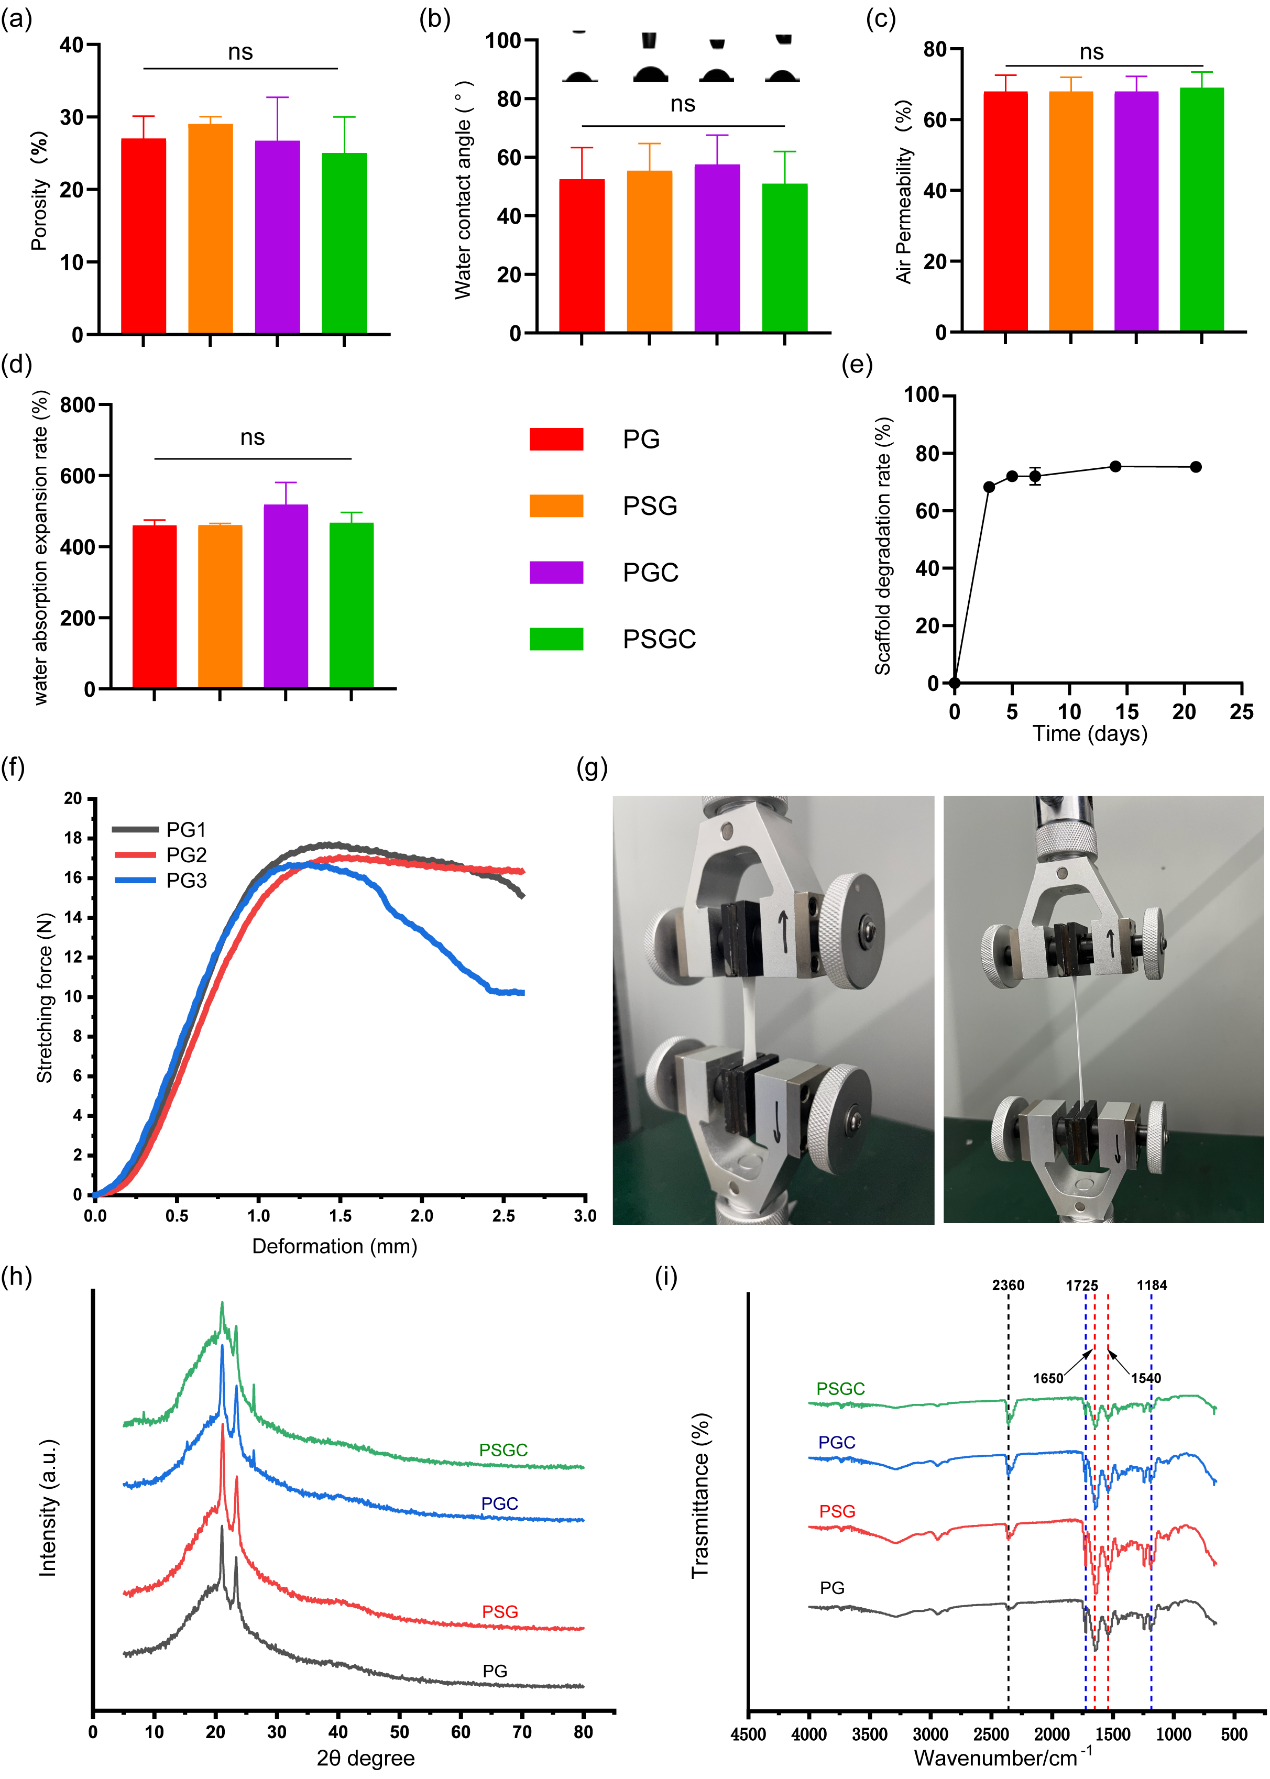


**Figure S1** Performance of several coaxial electrospun nanofiber membranes. (a–d) Basic properties of materials. (e) Biodegradation rate. (f) Strain–stress curve. (g) Mechanical test images of materials. (h) XRD component analysis. (i) FTIR spectra. Results are expressed as the mean ± standard deviation (n = 3).

**Abbreviations:** XRD, X-ray diffraction; FTIR, fourier-transform infrared spectroscopy.

**Table S1**

Primer sequence details for real-time qPCR

| Gene | Forward Primer | | Reverse Primer |
| --- | --- | --- | --- |
| *GAPDH* | | 5′-CACCACCAACTGCTTAGC-3′ | 5′-TTCACCACCTTCTTGATGTC-3′ |
| *ALP* | | 5′-GCAGTATGAATTGAATCGGAACAAC-3′ | 5′-ATGGCCTGGTCCATCTCCAC-3′ |
| *COL1* | | 5′-GACATGTTCAGCTTTGTGGACCTC-3′ | 5′-GGGACCCTTAGGCCATTGTGTA-3′ |
| *OCN* | | 5′-ACCATCTTTCTGCTCACTCTGCT-3′ | 5′-CCTTATTGCCCTCCTGCTTG-3′ |
| *RUNX2* | | 5′-CTGCAAGCAGTATTTACAACAGAGG-3′ | 5′-GGCTCACGTCGCTCATCTT-3′ |
| *OPN* | | 5′-TACGACCATGAGATTGGCAGTGA-3′ | 5′-TATAGGATCTGGGTGCAGGCTGTAA-3′ |
| *OSX* | | 5′-AGGCCTTTGCCAGTGCCTA-3′ | 5′-GCCAGATGGAAGCTGTGAAGA-3′ |
| *AXIN1* | | 5′-CTACCTCACATTCCTCGCACTTACC-3′ | 5′-CGCTTCAGCCGTTCCTCCAAC-3′ |
| *AXIN2* | | 5′-AGCACCTCTCCTCTGTTACCTTCC-3′ | 5′-GTCAACGCTCTGCCCTACACTATAC |
| *β-catenin* | | 5′-CAAGGTGTCTGAGGCTGGTTGTC-3′ | 5′-ATGTGCTGGGCTTTGAGGATGC-3′ |
| *LRP5* | | 5′-CAAGACGATCAGCCGAGCCTTC-3′ | 5′-CATCCAGTCCACAGCCATTCCTTC-3′ |
| *LRP6* | | 5′-GTCAGCGGAGGAGAACTATGAAAGC-3′ | 5′-CGGTGGAGGCAGTCAGAGGAG-3′ |
| *WNT3A* | | 5′-GCGTGGTGACTGACTGTCTTCTG-3′ | 5′-GTGGTGGGTGGATATAGCAGCATTG-3′ |
| *CD31* | | 5′-GTCATGGCCATGGTCGAGTA-3′ | 5′-CTCCTCGGCATCTTGCTGAA-3′ |
| *PDGF* | | 5′-GCCACTCATCACAGCCTCCATTC-3′ | 5′-CCTCCGAACTTAACGTCCACCAC-3′ |
| *NOS3* | | 5′-TGGAGAGAGCTTTGCAGCAG-3′ | 5′-GATATCTCGGGCAGCAGCTT-3′ |
